# Supplementary material
Source: publisher site journal article supplement (https://www.dovepress.com/article/596237)
Supplement: Supplementary file 1 [file 596237%20Revised%20Supplementary%20Materials.docx]

***Lactobacillus johnsonii-*Derived Extracellular Vesicles Ameliorate Alcohol-Exacerbated Experimental Autoimmune Prostatitis by Inhibiting M1 Macrophage Polarization**

**Authors:**

Qiqi Zhu1-2,*, Yifu Liu3,*, Weiwen Hu4,*, Ying Liu5, Shengqiang Fu6, Wenjie Xie1-2, Ji Liu7, Yunbing Xiong1-2, Ting Sun1-2, Binbin Gong1-2

**Affiliations:**

1Department of Urology, The First Affiliated Hospital, Jiangxi Medical College, Nanchang University, Nanchang, Jiangxi, China.

2Jiangxi Provincial Key Laboratory of Urinary System Diseases, Department of Urology, the First Affiliated Hospital, Jiangxi Medical College, Nanchang University, Nanchang, Jiangxi, China.

3Department of Urology, The Second Affiliated Hospital, Hengyang Medical School, University of South China, Hengyang, Hunan, China.

4Department of Ophthalmology, The First Affiliated Hospital, Jiangxi Medical College, Nanchang University, Nanchang, Jiangxi, China.

5Department of Pathology, The First Affiliated Hospital, Jiangxi Medical College, Nanchang University, Nanchang, Jiangxi, China.

6Department of Anesthesiology, The First Affiliated Hospital, Jiangxi Medical College, Nanchang University, Nanchang, Jiangxi, China.

7Department of Transplantation, Jiangxi Provincial People’s Hospital, The First Affiliated Hospital of Nanchang Medical College, Nanchang, Jiangxi, China.

*Qiqi Zhu, Yifu Liu and Weiwen Hu contributed equally to this work.

**Correspondence:**Ting Sun, Email: 361439919033@email.ncu.edu.cn; Binbin Gong, Email: ndyfy05944@ncu.edu.cn.

**Supplementary Table**

**Table S1** Primer sequence

| Primer | Primer sequence (5’ to 3’) |
| --- | --- |
| Mouse IL-1β_F | TGGACCTTCCAGGATGAGGACA |
| Mouse IL-1β_R | GTTCATCTCGGAGCCTGTAGTG |
| Mouse IL-6_F | TACCACTTCACAAGTCGGAGGC |
| Mouse IL-6_R | CTGCAAGTGCATCATCGTTGTTC |
| Mouse TNF-α_F | GGTGCCTATGTCTCAGCCTCTT |
| Mouse TNF-α_R | GCCATAGAACTGATGAGAGGGAG |
| Mouse GAPDH_F | GGTTGTCTCCTGCGACTTCA |
| Mouse GAPDH_R | TGGTCCAGGGTTTCTTACTCC |
| Mouse iNOS_F | GCGAAAGGTCATGGCTTCAC |
| Mouse iNOS_R | CTGGTCCATGCAGACAACCT |
| Mouse Arg-1_F | CTTGCGAGACGTAGACCCTG |
| Mouse Arg-1_R | TCCATCACCTTGCCAATCCC |

**Supplementary Figure**

**
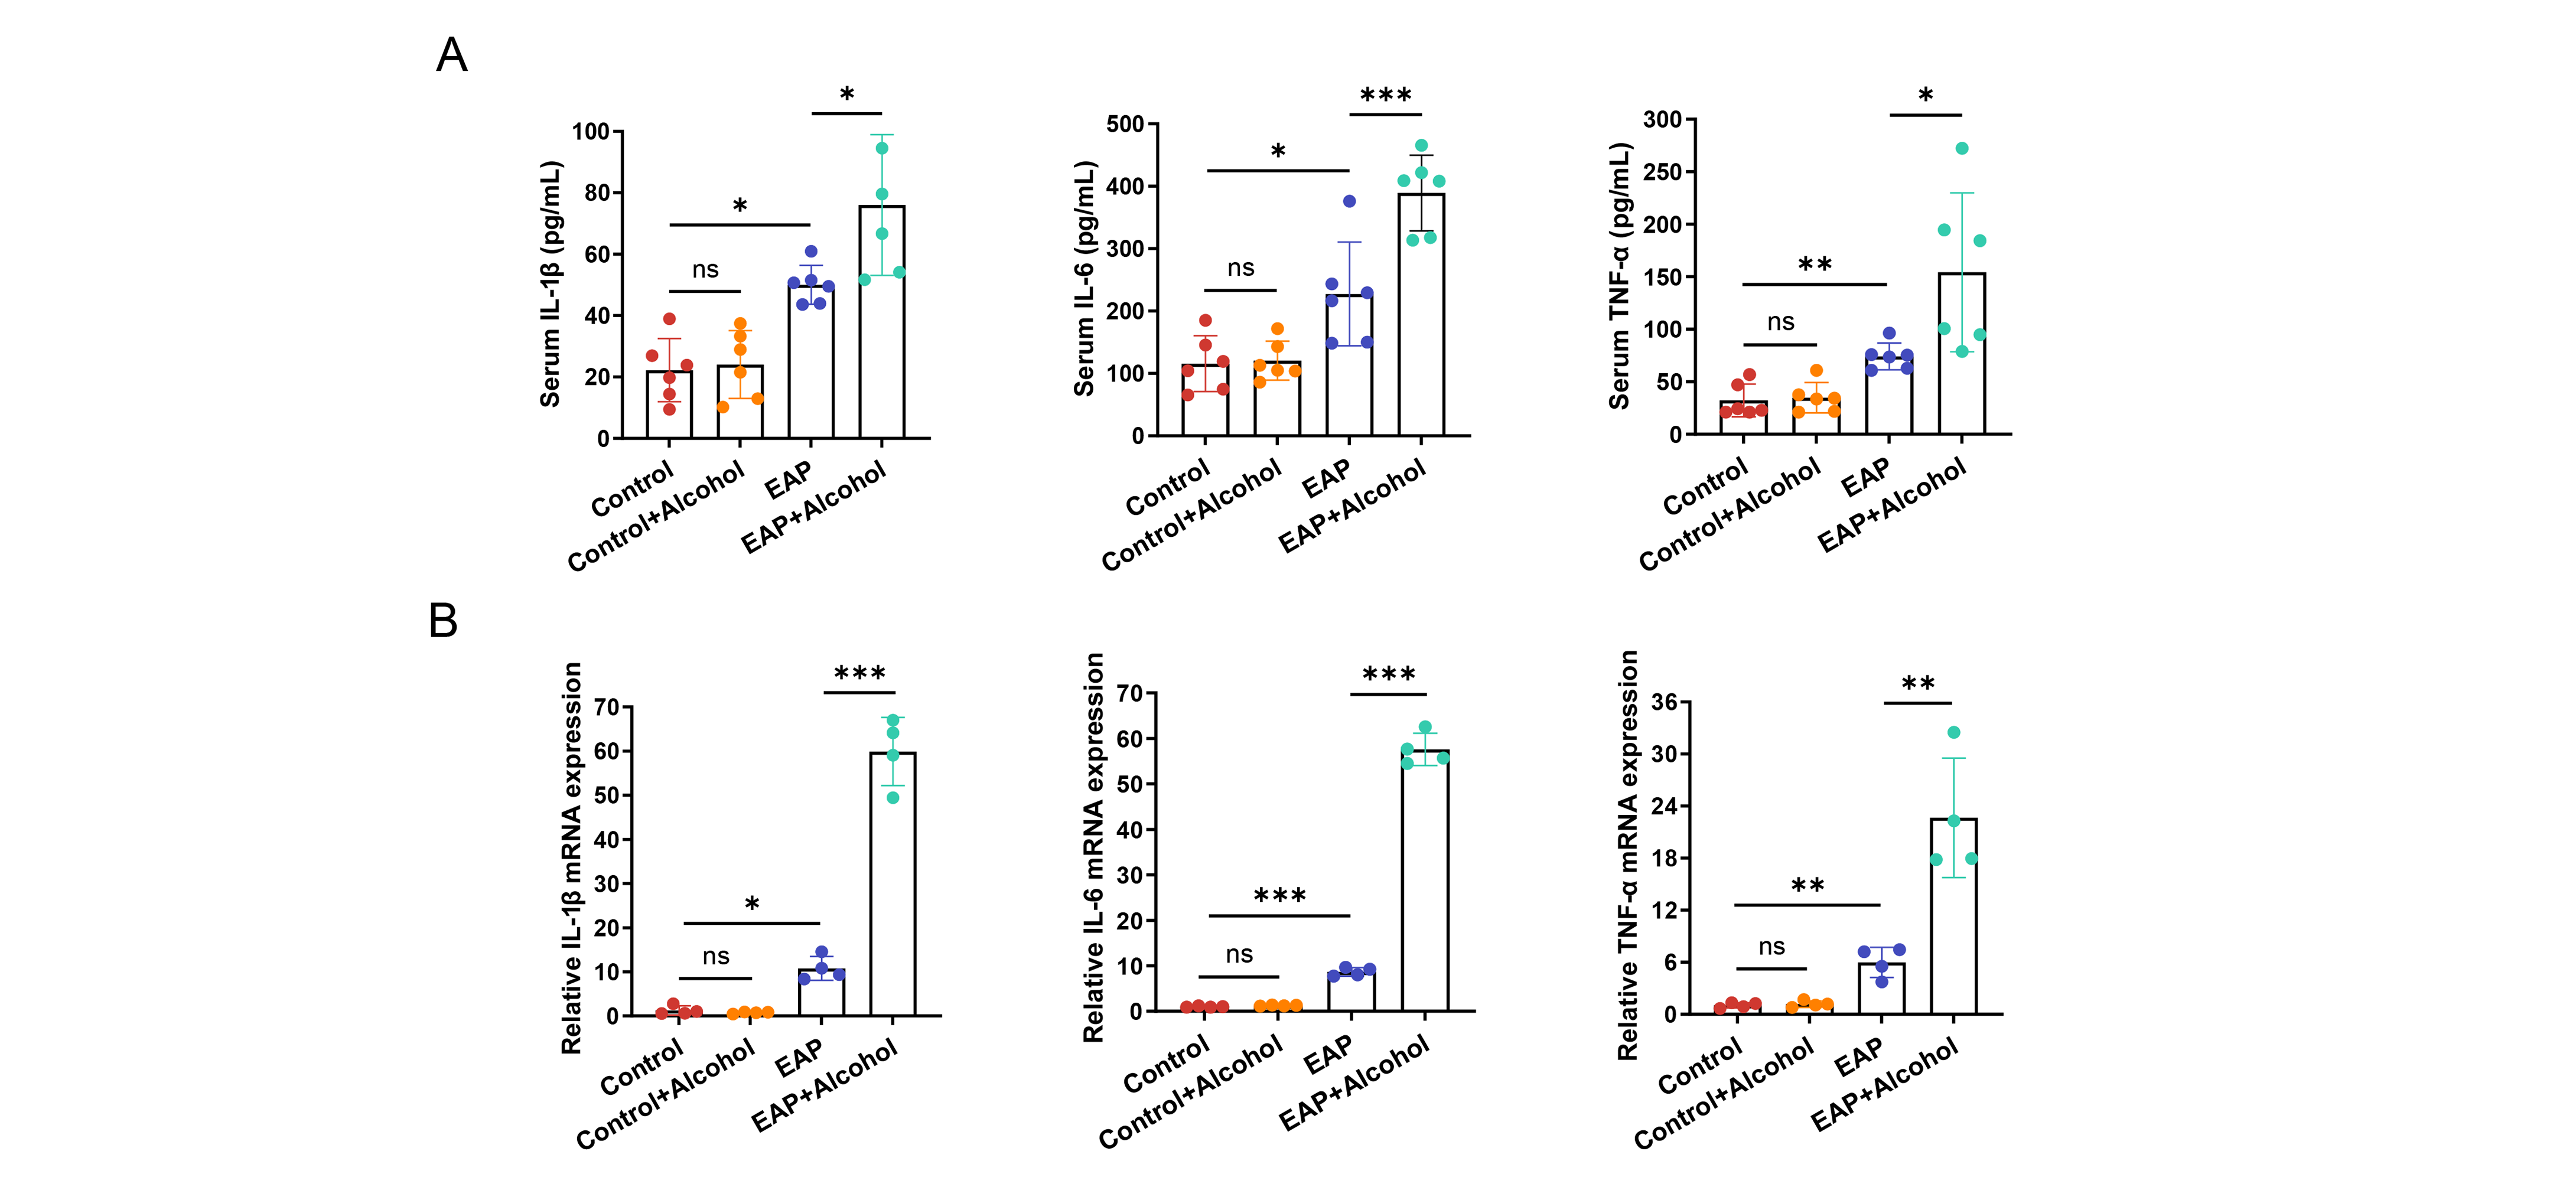
**

**Figure S1** Alcohol consumption increases the levels of pro‑inflammatory factors in serum and prostate tissue of EAP mice. **(A)** Pro-inflammatory cytokine levels in serum. **(B)** Pro-inflammatory cytokine mRNA expression in prostate tissues. Data are presented as mean ± SD (n = 6 for A, n = 4 for B). *, *p* < 0.05; **, *p* < 0.01; ***, *p* < 0.001; ns, not significant.

**
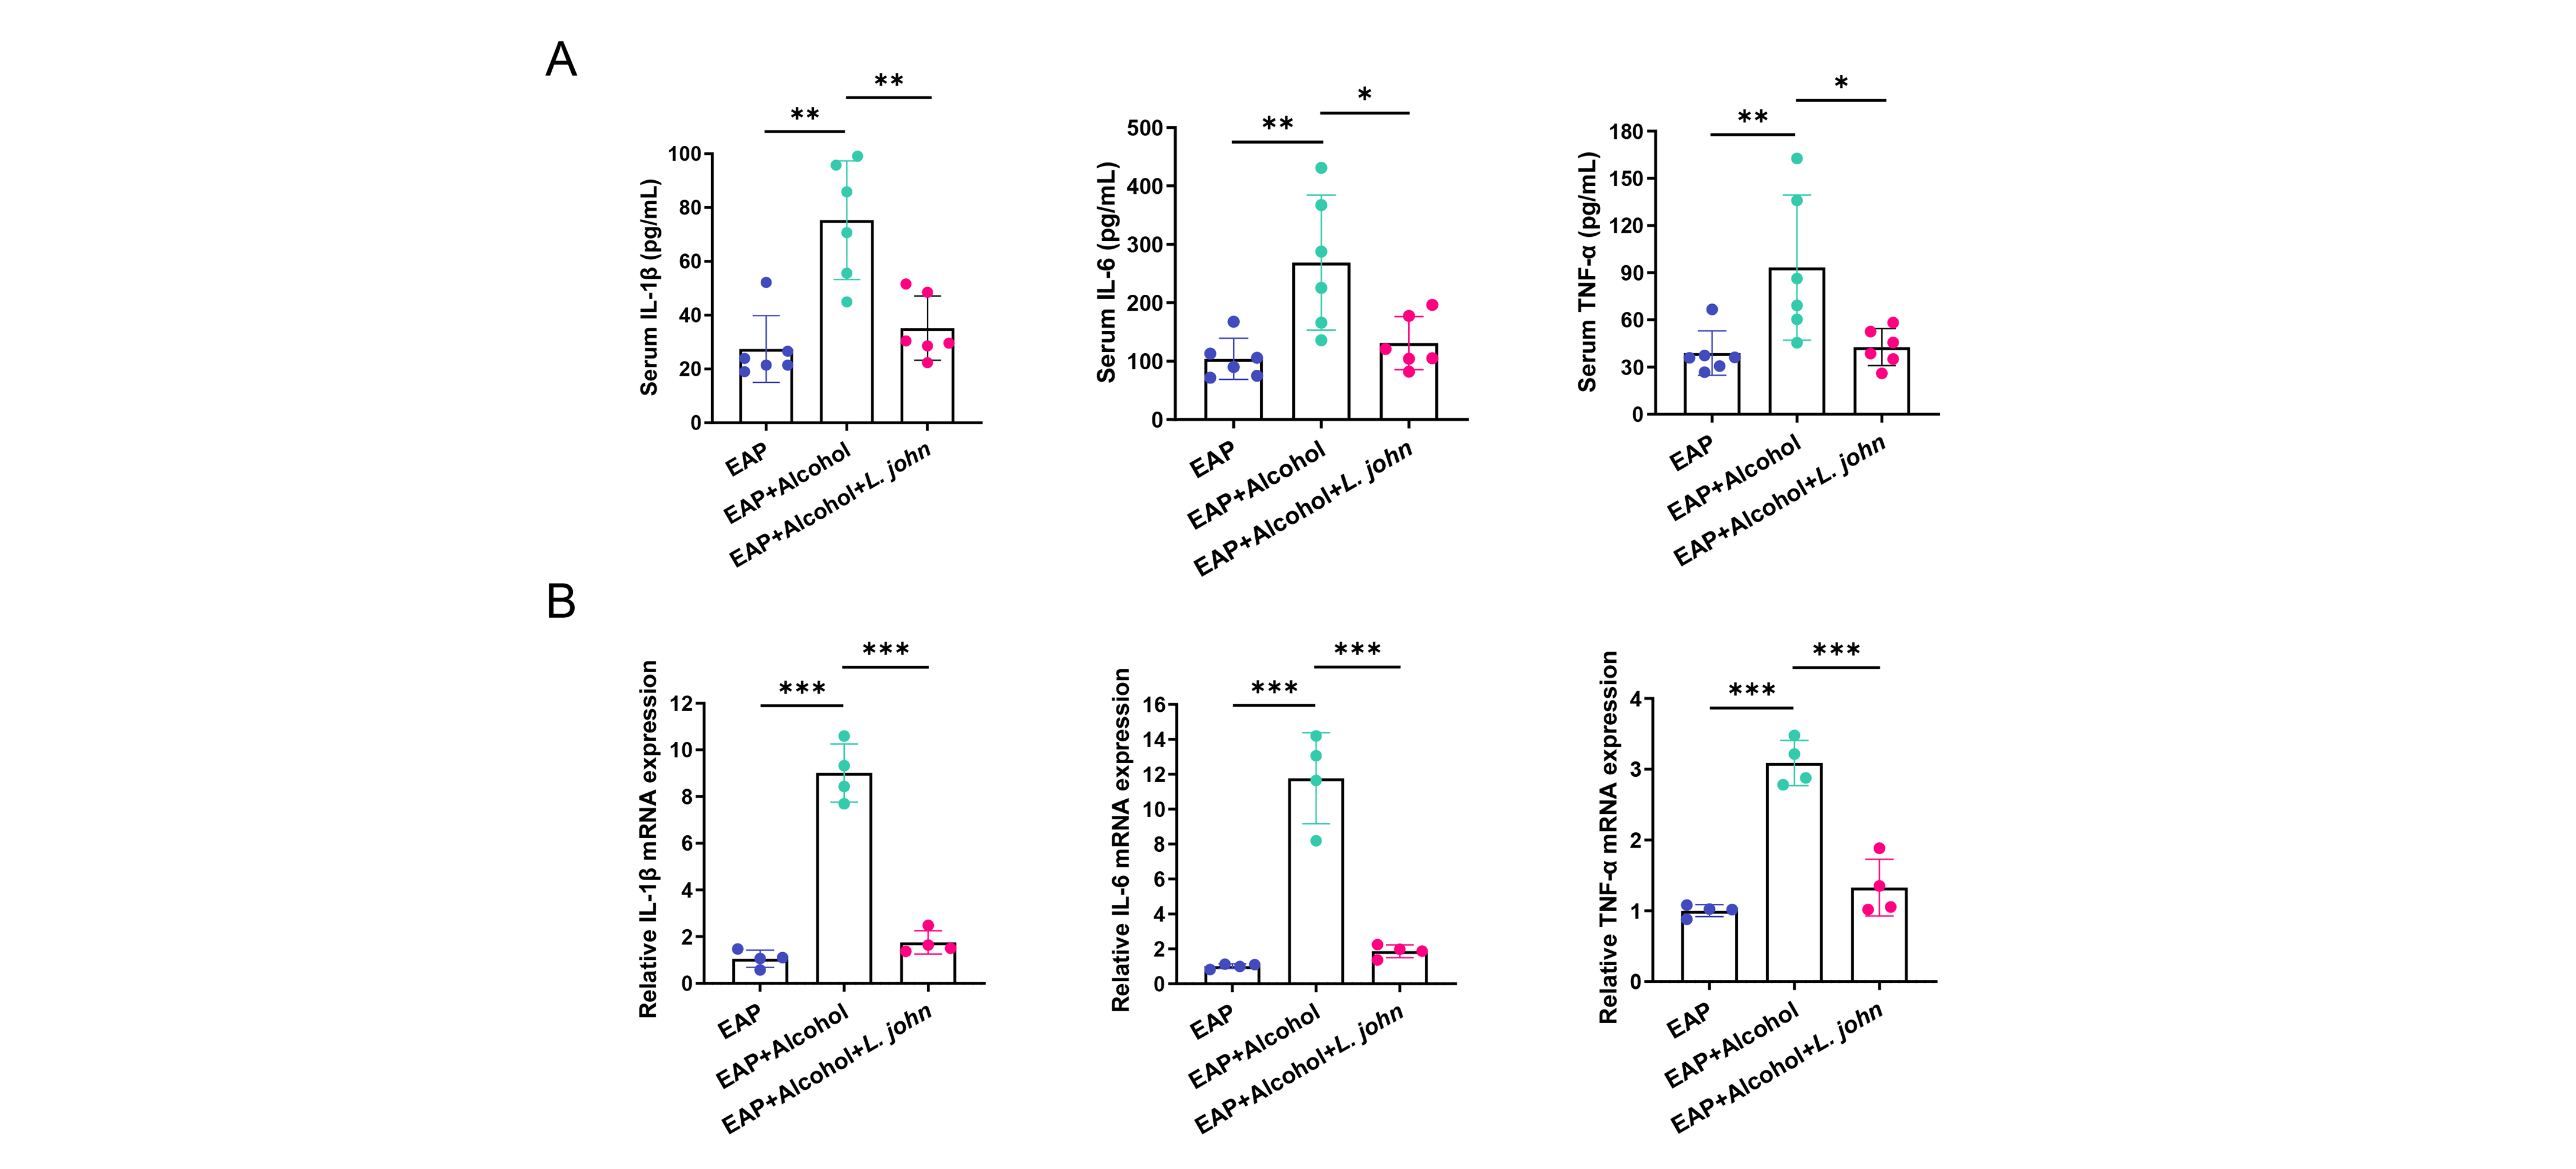
**

**Figure S2** Transplantation of *L. john* reduces the levels of pro‑inflammatory factors in serum and prostate tissue of alcohol‑treated EAP mice. **(A)** Pro-inflammatory cytokine levels in serum. **(B)** Pro-inflammatory cytokine mRNA expression in prostate tissues. Data are presented as mean ± SD (n = 6 for A, n = 4 for B). *, *p* < 0.05; **, *p* < 0.01; ***, *p* < 0.001.

**
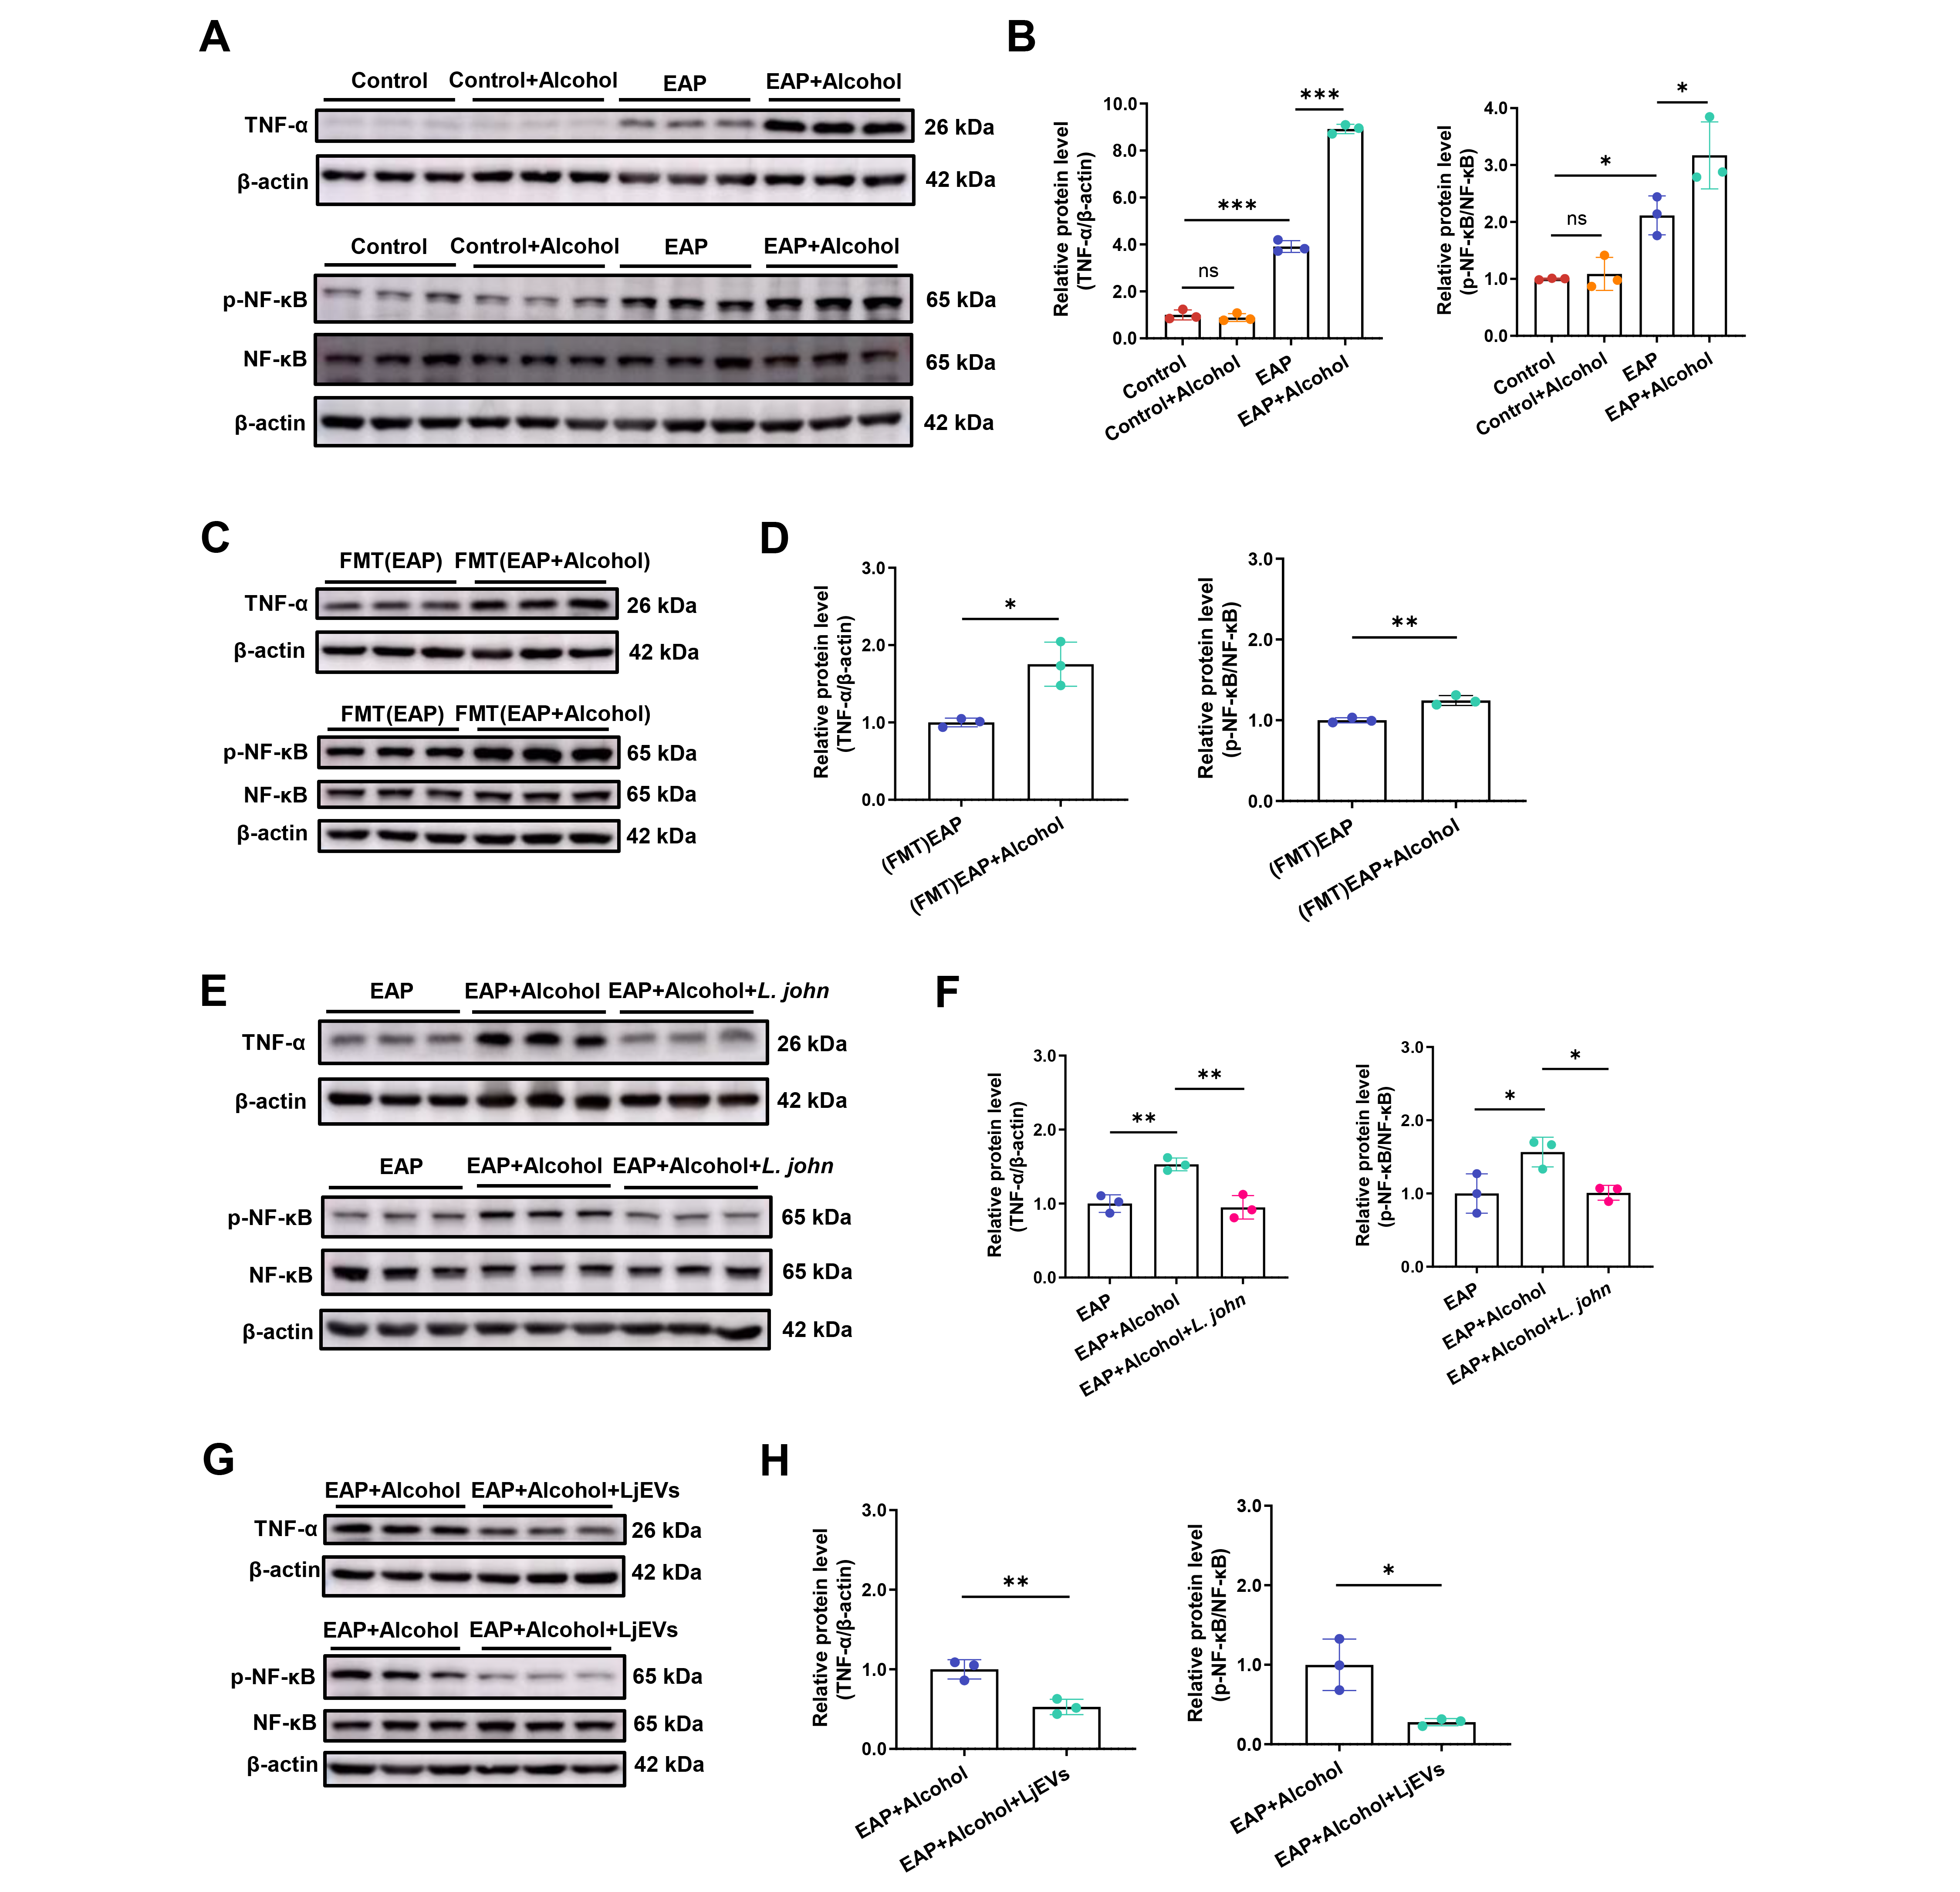
**

**Figure S3** Validation of the TNF-α/NF-κB pathway in the mouse prostate. **(A-B)** Western blot analysis of protein expression in the TNF-α/NF-κB pathway across the Control, Control+Alcohol, EAP, and EAP+Alcohol groups. **(C-D)** Western blot analysis of protein expression in the TNF-α/NF-κB pathway across the (FMT)EAP and (FMT)EAP+Alcohol group. **(E-F)** Western blot analysis of protein expression in the TNF-α/NF-κB pathway across the EAP, EAP+Alcohol and EAP+Alcohol+*L.* *john* groups. **(G-H)** Western blot analysis of protein expression in the TNF-α/NF-κB pathway across the EAP+Alcohol and EAP+Alcohol+LjEVs groups. Data are presented as mean ± SD (n = 3 for A-H). *, *p* < 0.05; **, *p* < 0.01; ***, *p* < 0.001; ns, not significant.
